# Supplementary material
Source: PubMed Central journal article supplement (PMC6648288)
Supplement: ao9b01314_si_001.pdf [file ao9b01314_si_001.pdf]

## **Electronic Supplementary Information**

### **Exploring colorimetric-real time sensing behaviour of a newly designed CT complex toward nitrobenzene and $\text{Co}^{2+}$ : Spectrophotometric, DFT/TD-DFT and mechanistic insights**

Ishaat M. Khan\*, Sonam Shakya

*Department of Chemistry, Aligarh Muslim University, Aligarh 202002, India*

### Energy components of optimised CTC structure-

Wave-function normalization = 1.0000000000

One electron energy = -4838.1762948423

Two electron energy = 2057.8838655054

Nuclear repulsion energy = 1654.7549552613

Total energy = -1125.5374740755

Electron-electron potential energy = 2057.8838655054

Nucleus-electron potential energy = -5954.9935885800

Nucleus-nucleus potential energy = 1654.7549552613

Total potential energy = -2242.3547678133

Total kinetic energy = 1116.8172937377

Virial ratio (v/t) = 2.0078080635

### Electrostatic moments -

| Point 1 | X         | Y        | Z (bohr)  | charge      |
|---------|-----------|----------|-----------|-------------|
|         | 10.092341 | 2.800889 | 12.964250 | 0.00 (a.u.) |
|         | DX        | DY       | DZ        | /D/ (DEBYE) |
|         | -5.709808 | 2.564538 | 0.938024  | 6.329190    |

**Table S1.** Crystal data with refinement parameters for CTC.

| <b>Formula sum</b>                       | <b>N4 C10 H8 O6</b>                         |
|------------------------------------------|---------------------------------------------|
| Formula weight                           | <b>594.367 g/mol</b>                        |
| Temperature                              | RT                                          |
| Wavelength                               | <b>0.71073 (Å)</b>                          |
| Crystal system                           | triclinic                                   |
| Space-group                              | <b>P 1 (2)</b>                              |
| Cell Lengths                             | a=7.7171 Å b=12.0362 Å<br>c=13.6112 Å       |
| Cell Angles                              | a=97.7100° β=101.9200°<br>γ=92.3600°        |
| Cell volume                              | <b>1222.73 Å<sup>3</sup></b>                |
| Calc. density                            | 0.459084 g/cm <sup>3</sup>                  |
| Bond precision                           | C-C = 0.0046 Å                              |
| Absorption coefficient                   | 0.065                                       |
| Theta range for data collection          | 2.26 to 28.46°                              |
| Reflections collected / unique           | 20895 / 7935 [R(int) = 0.1191]              |
| Number of observed reflections [I>2σ(I)] | 3580                                        |
| Absorption correction                    | Empirical (SADABS)                          |
| Refinement method                        | Full-matrix least-squares on F <sup>2</sup> |
| Goodness-of-fit on F <sup>2</sup>        | 0.9810                                      |
| Final R indices [I>2σ(I)]                | R1=0.096 WR2 = 0.231                        |
| R indices (all data)                     | R1=0.200 WR2 = 0.317                        |
| Largest diff. peak and hole              | 0.7700, -0.7000 e.Å <sup>-3</sup>           |

**Table S2.** Weight loss, enthalpy ( $\Delta H$ ), and degradation temperature (T), for pyrazole, 3,5-dinitrobenzoic acid and PYR: DNB CT complex.

| Step     | Imidazole       |                    |                 | Picric acid     |                    |                 | CTC [(IMH) <sup>+</sup> (PA)] |                    |                 |
|----------|-----------------|--------------------|-----------------|-----------------|--------------------|-----------------|-------------------------------|--------------------|-----------------|
|          | Weight loss (%) | T( <sup>0</sup> C) | $\Delta H$ (mJ) | Weight loss (%) | T( <sup>0</sup> C) | $\Delta H$ (mJ) | Weight loss (%)               | T( <sup>0</sup> C) | $\Delta H$ (mJ) |
| <b>1</b> | 99.92           | 199.93             | -371.74         | 99.26           | 274.44             | -276.04         | 81.98                         | 314.27             | -189.10         |
| <b>2</b> |                 |                    | -526.18         |                 |                    | -430.63         |                               |                    | -176.82         |
| <b>3</b> |                 |                    |                 |                 |                    |                 |                               |                    | -354.00         |

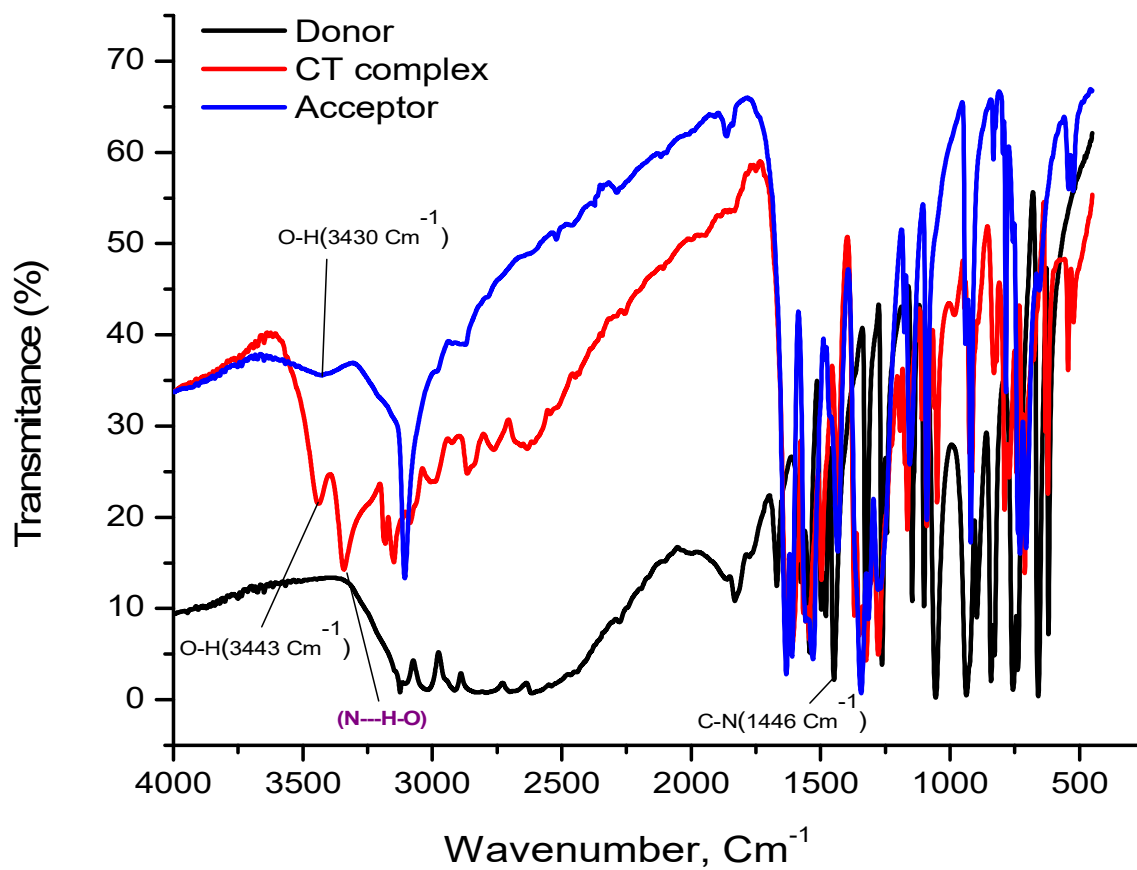

**Figure S1.** FTIR spectra of PA (top), charge transfer complex (middle) and IM (bottom).

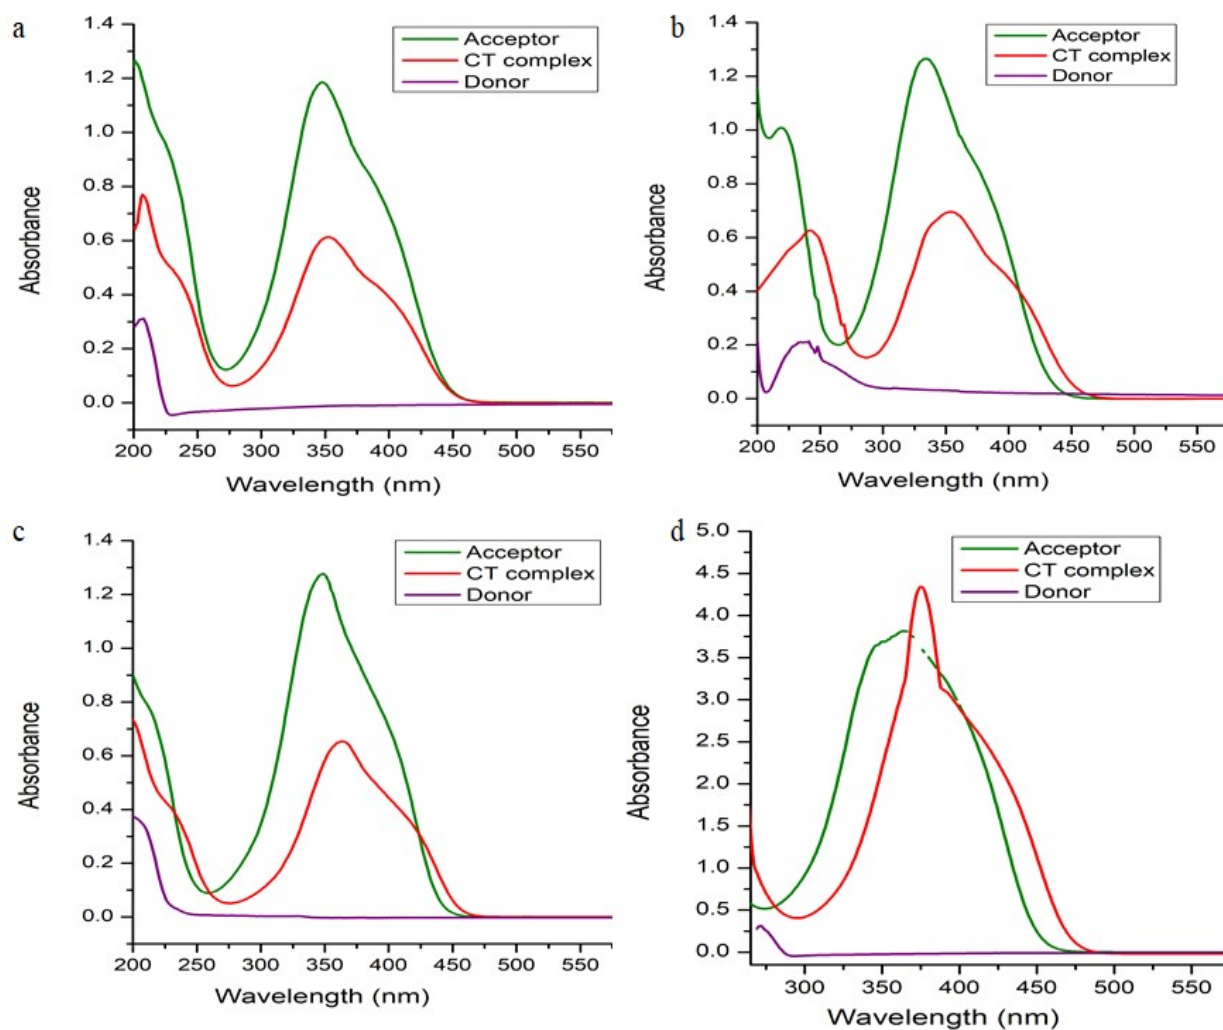

**Figure S2.** Electronic absorption spectra of acceptor ( $1 \times 10^{-4}$  M), CT complex ( $1 \times 10^{-4}$  M +  $1 \times 10^{-4}$  M) and donor ( $1 \times 10^{-4}$  M) in (a) ethanol, (b) methanol, (c) acetonitrile and (d) DMSO/H<sub>2</sub>O at room temperature.

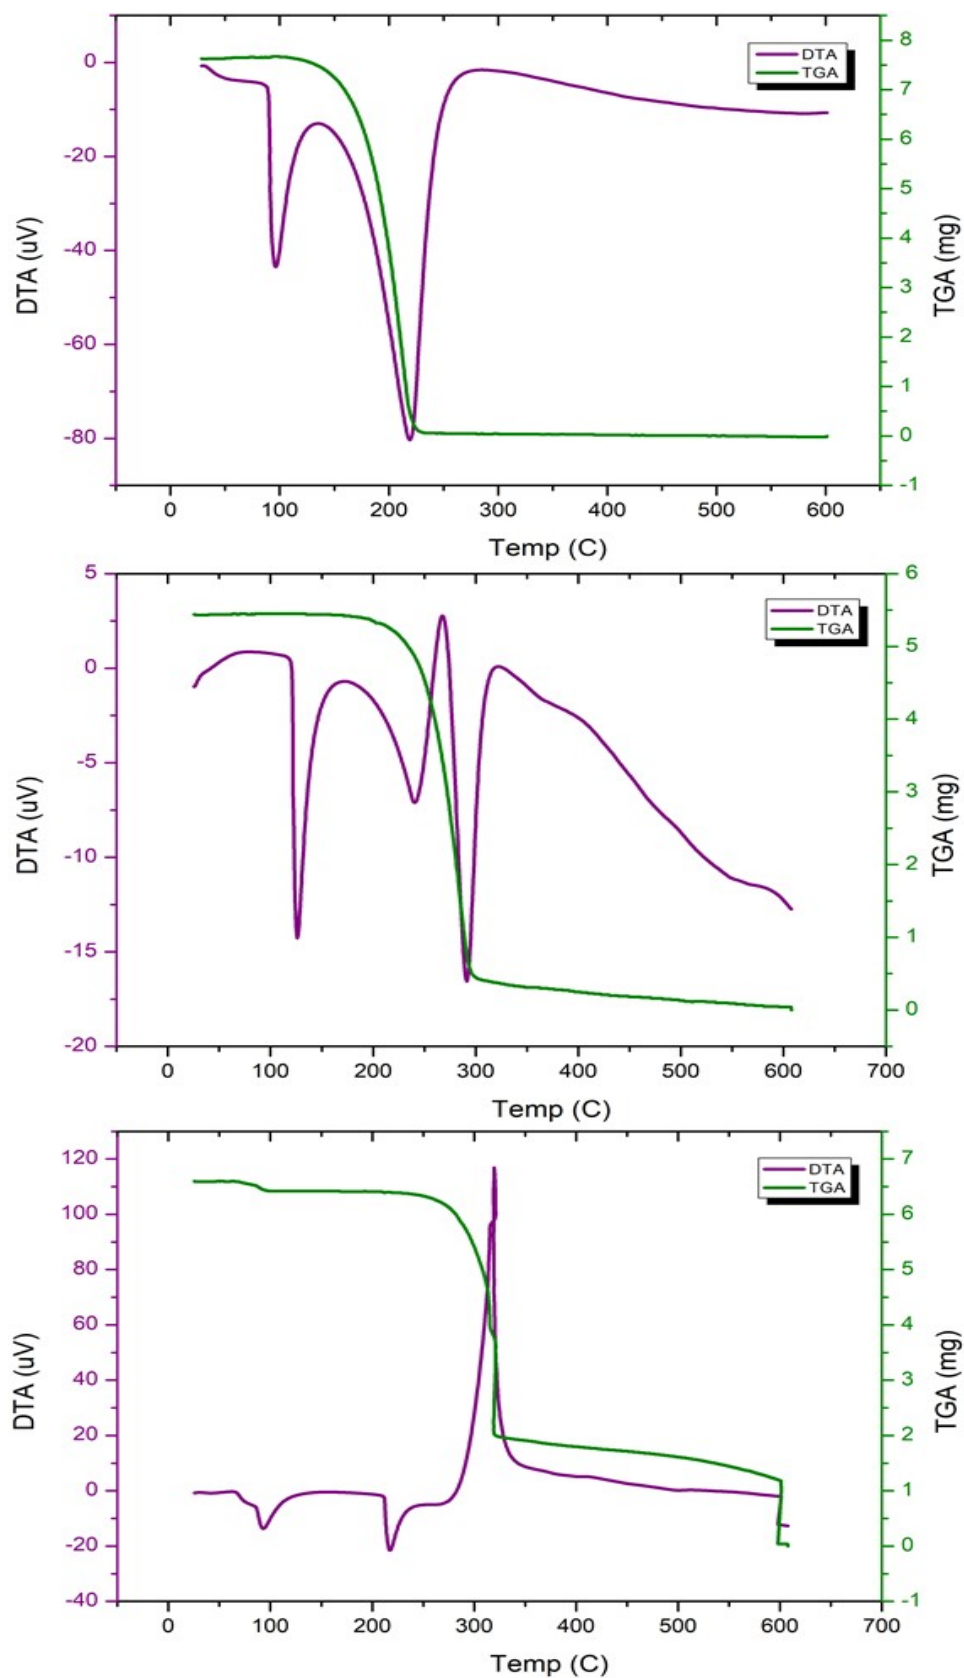

**Figure S3.** TGA–DTA curves for (Top) IM, (middle) PA and (bottom) CTC.

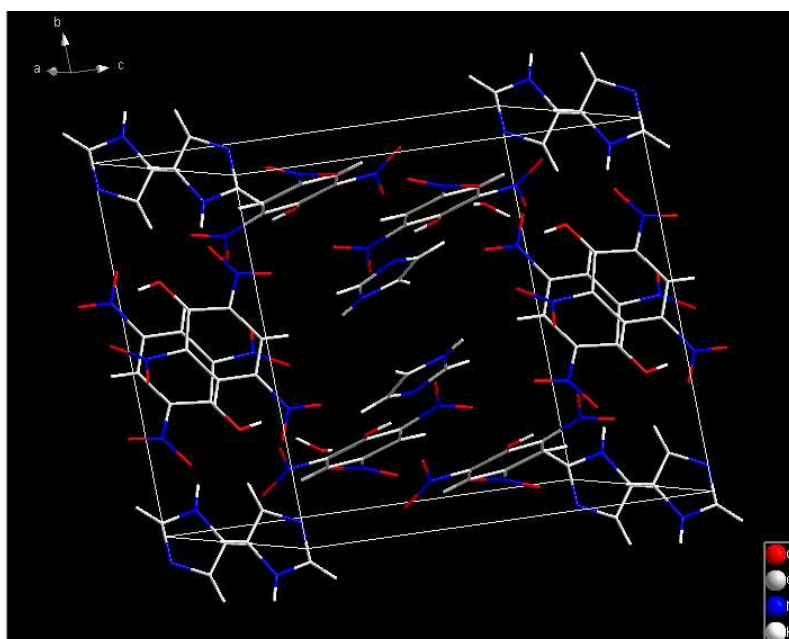

**Figure S4.** Crystal packing of the synthesised CTC obtained through SC-XRD.

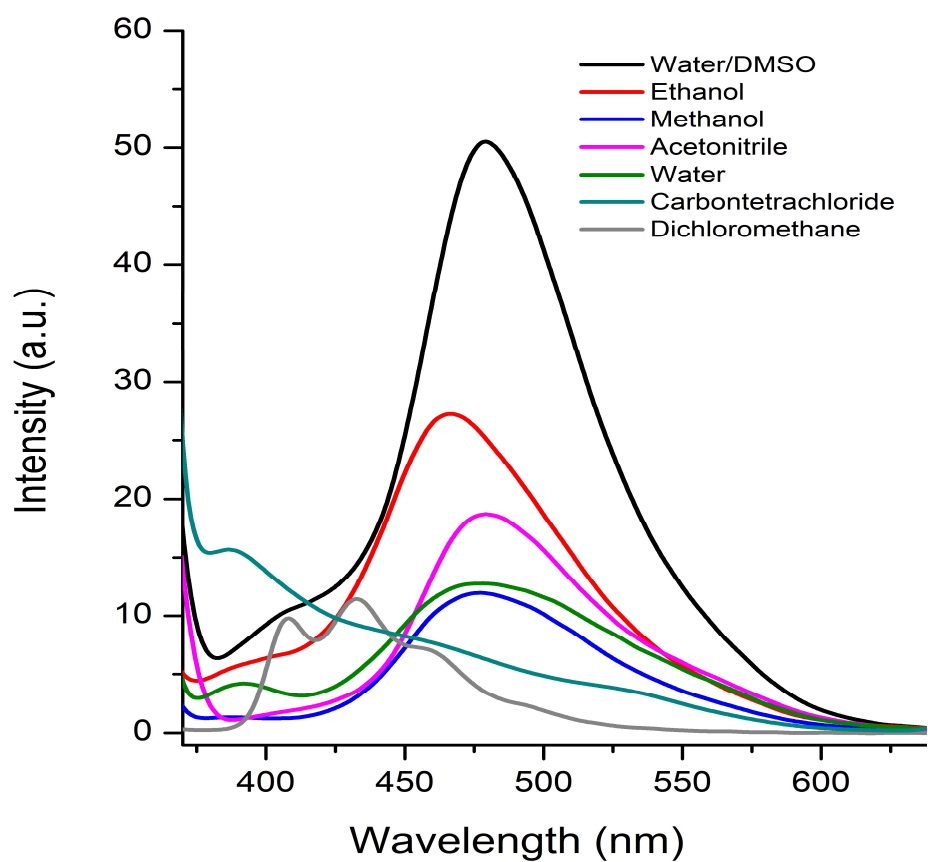

**Figure S5.** Emission spectra of CTC dispersed in different solvents upon excitation at 340 nm.



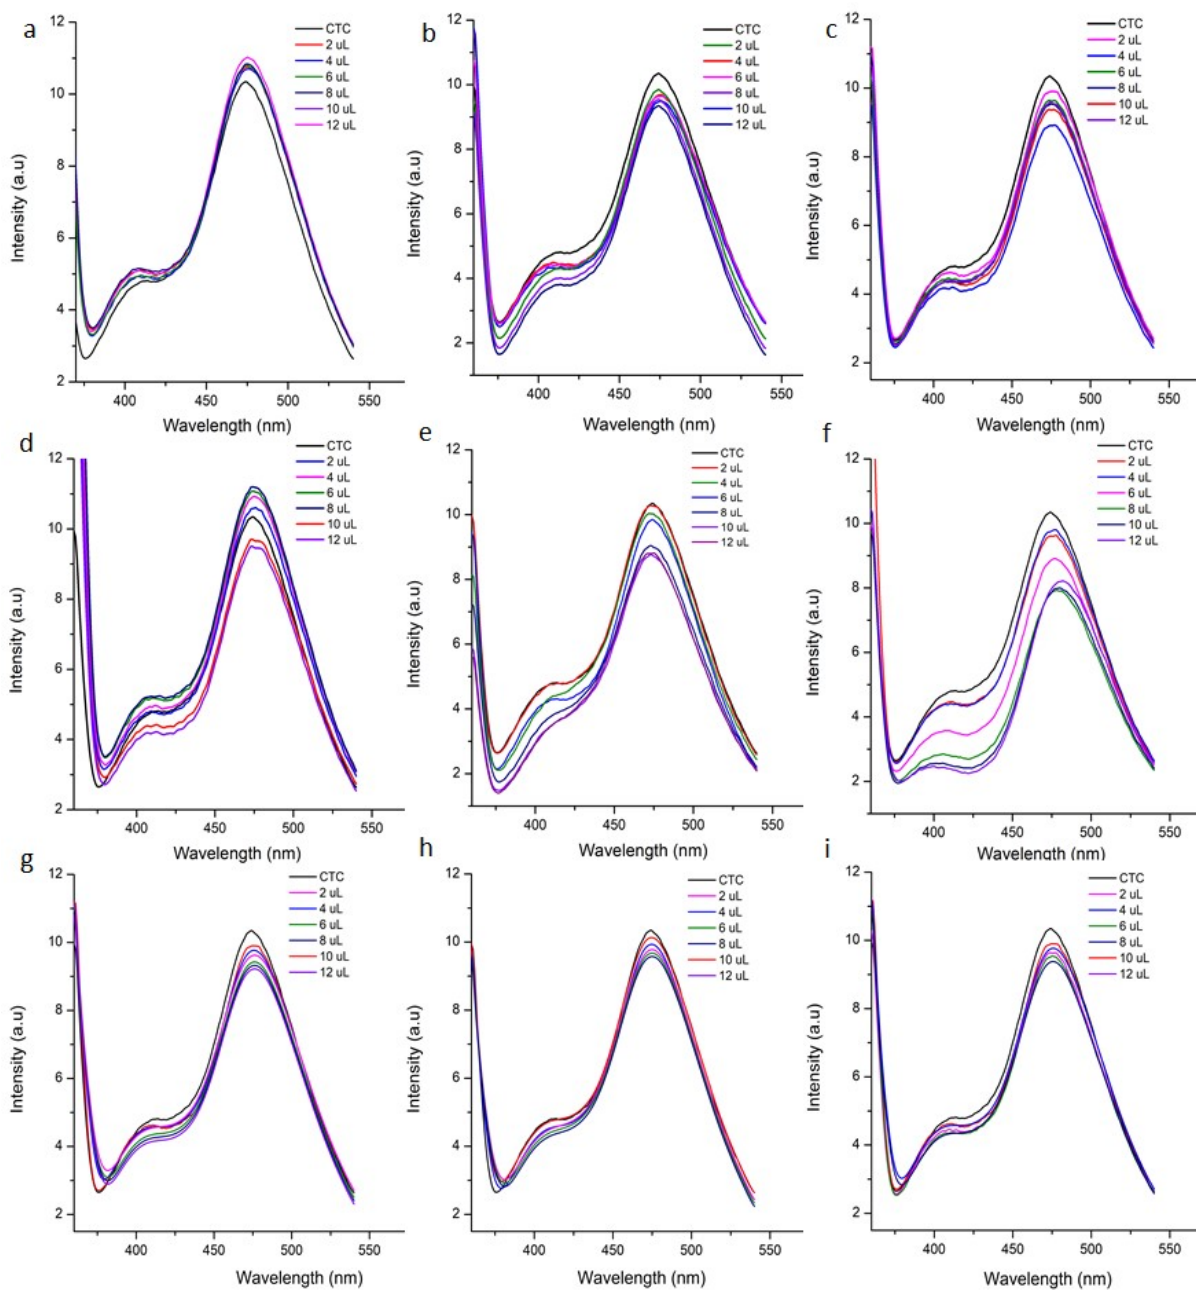

**Figure S6.** The change in fluorescence intensity of CTC upon incremental addition of (a) TNP, (b) DNB, (c) DNP, (d) MNA, (e) ONP, (f) ONA, (g) DNT, (h) NT and (i) p-DNB.

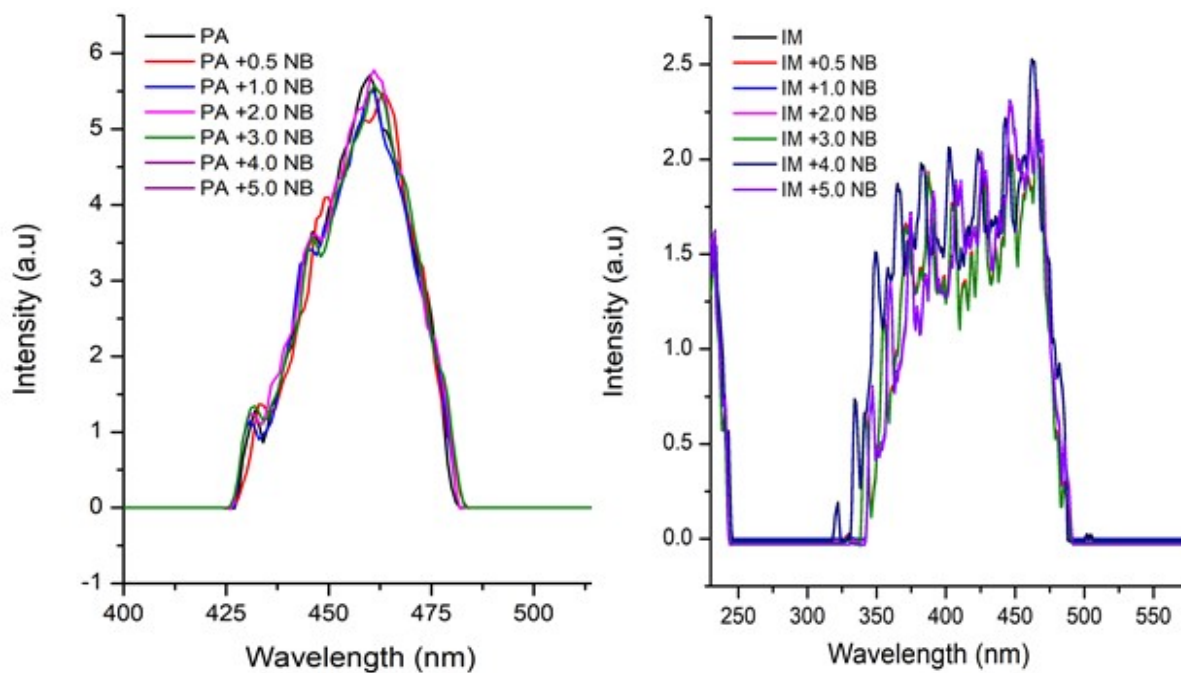

**Figure S7.** The change in fluorescence intensity of PA (left) and IM (right) on adding NB.

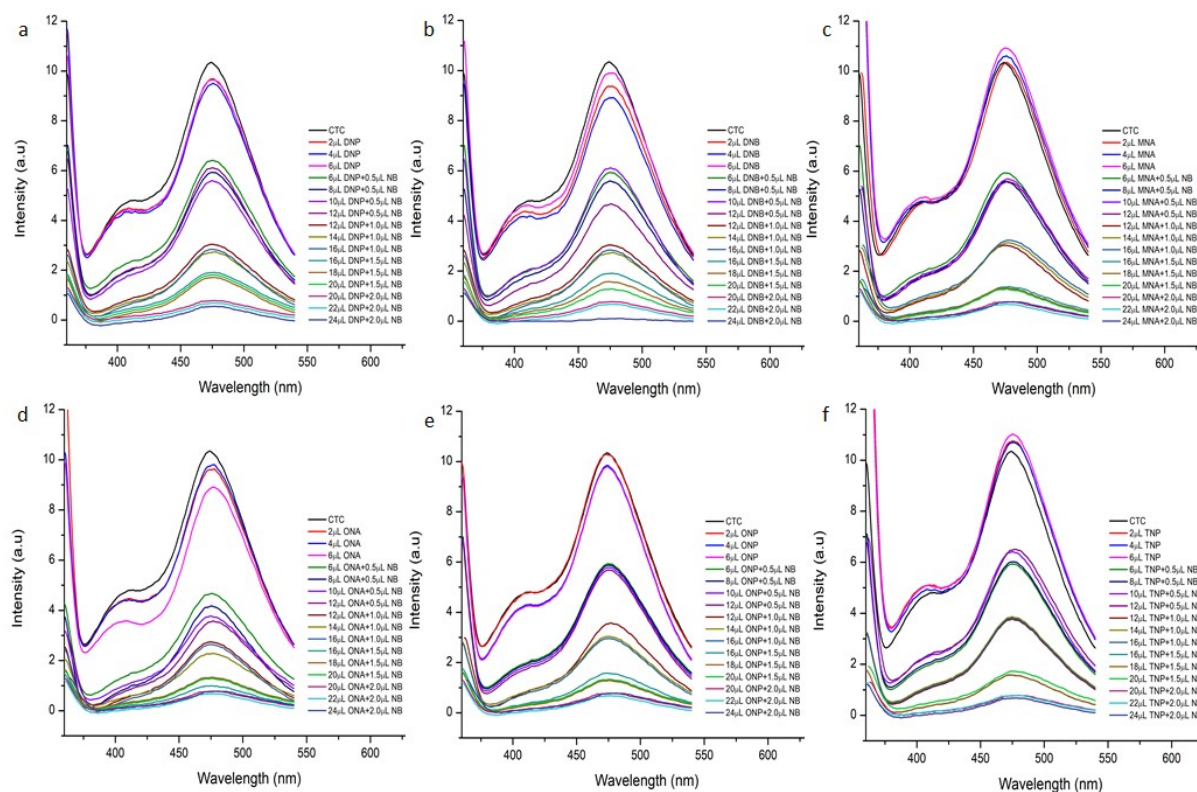

**Figure S8.** The change in fluorescence intensity of CTC upon addition of different nitro analytes (a) DNP, (b) DNB, (c) MNA, (d) ONA, (e) ONP and (f) TNP followed by NB.

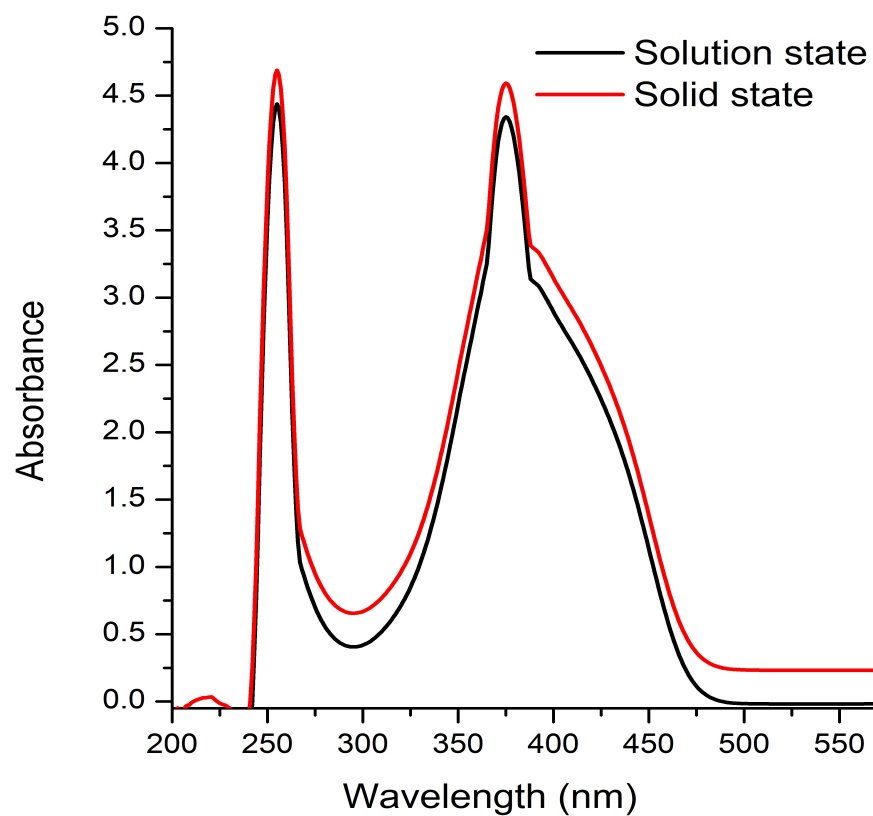

**Figure S9.** Solution and solid state UV-vis spectra of CTC.

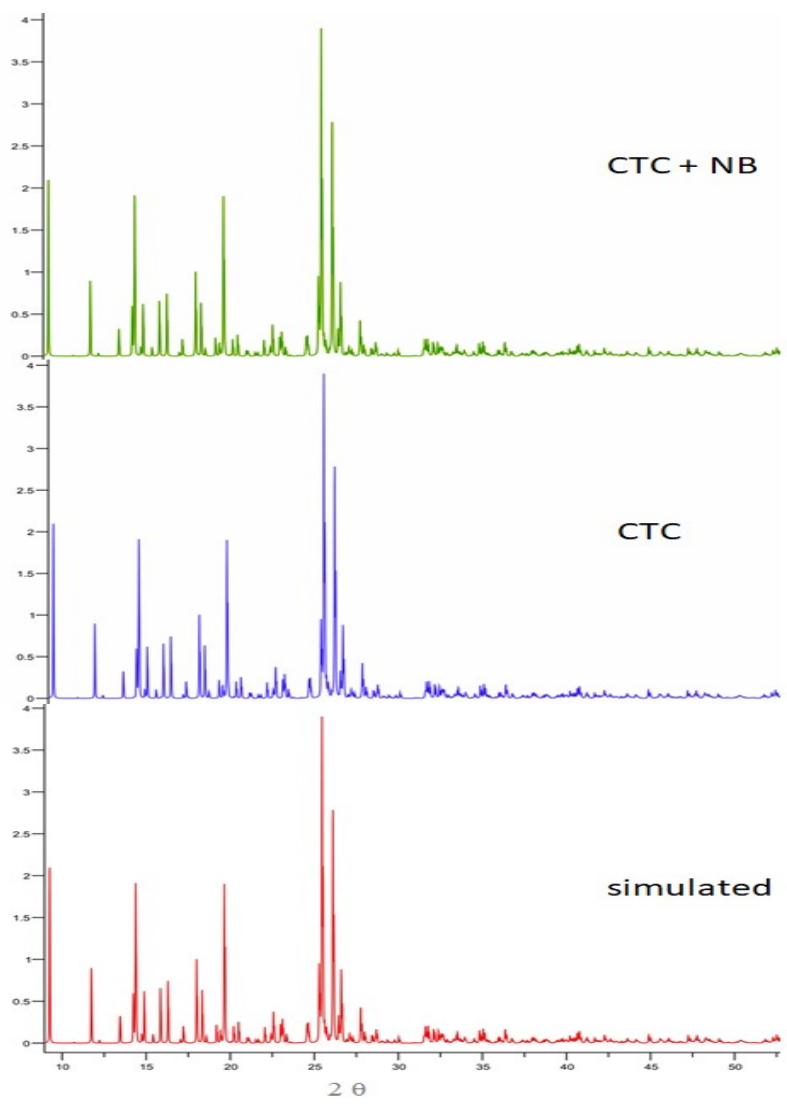

**Figure S10.** Powder XRD patterns of CTC+NB (top), CTC (middle) and simulated (bottom).

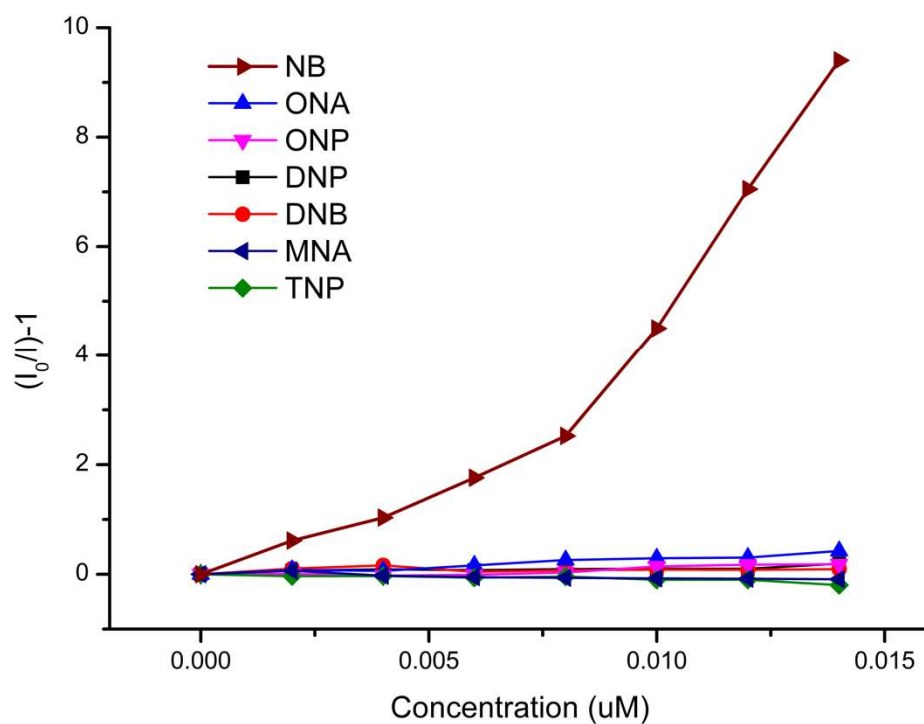

**Figure S11.** Stern-Volmer (SV) plots for various nitro analytes in DMSO/H<sub>2</sub>O.

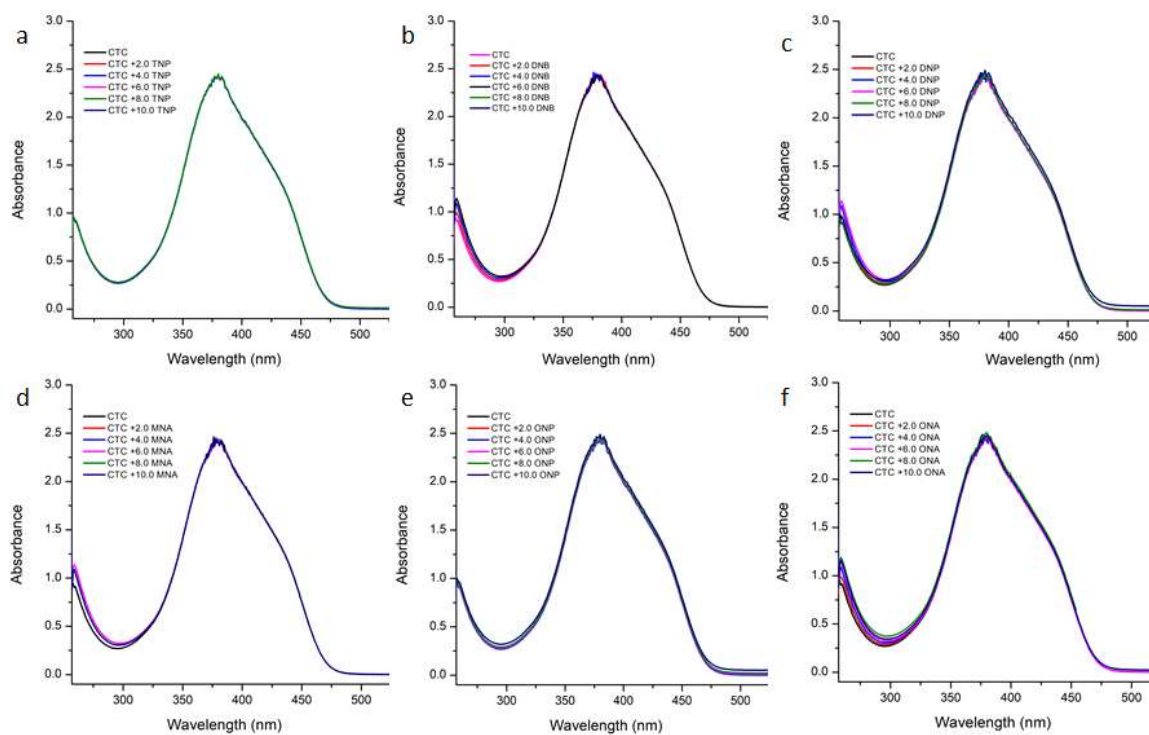

**Figure S12.** UV-vis spectra of CTC upon incremental addition of (a) TNP, (b) DNB, (c) DNP, (d) MNA, (e) ONP and (f) ONA.

**Table S3.** HOMO and LUMO energies calculated for nitro-analytes and ligand at B3LYP/6-31G\* level of theory.

| <b>Analytes</b> | <b>HOMO (eV)</b> | <b>LUMO (eV)</b> | <b>Band gap (eV)</b> |
|-----------------|------------------|------------------|----------------------|
| DNB             | -8.244           | -3.724           | 4.520                |
| ONP             | -9.877           | 1.150            | 8.050                |
| ONA             | -0.6133          | -0.803           | 0.191                |
| MNA             | -6.501           | -2.896           | 3.611                |
| DNP             | -6.311           | -3.611           | 2.621                |
| TNP             | -8.37            | -4.566           | 3.806                |
| NB              | -7.636           | -3.149           | 4.487                |
| CTC             | -6.911           | -3.005           | 4.010                |

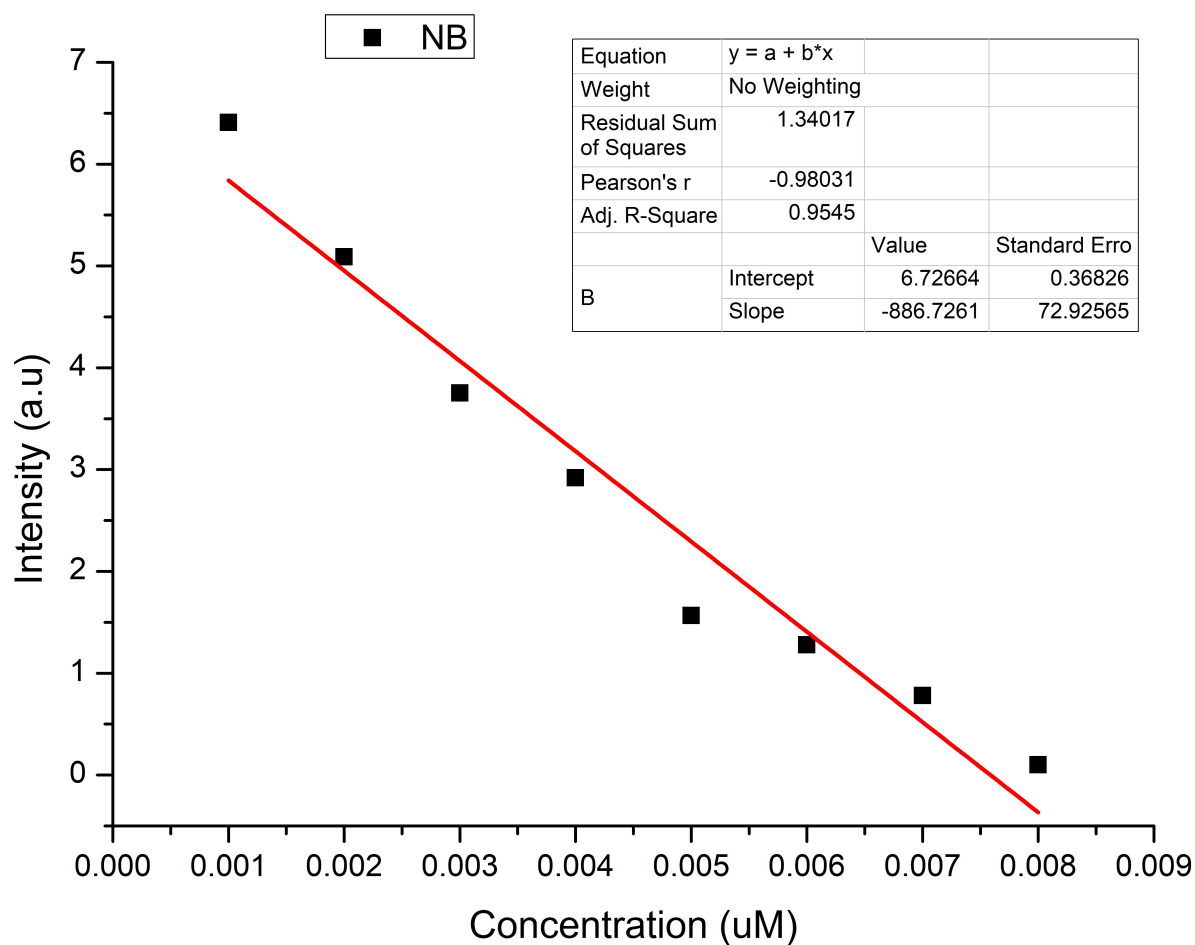

**Figure S13.** Linear region of fluorescence intensity of CTC upon addition of NB (0.5 – 5  $\mu$ L, 1 mM stock solution) in water/DMSO.

**Table S4.** Calculation of standard deviation for CTC.

| Blank Readings (only probe)                    | FL Intensity of CTC |
|------------------------------------------------|---------------------|
| Reading 1                                      | 10.35               |
| Reading 2                                      | 10.98               |
| Reading 3                                      | 11.58               |
| Reading 4                                      | 10.01               |
| Reading 5                                      | 11.99               |
| <b>Standard Deviation(<math>\sigma</math>)</b> | <b>0.8242997</b>    |

**Table S5.** Detection limit calculation of CTC for NB.

| Complex | Slope from Graph (m) | Detection limit ( $3\sigma/m$ ) |        |
|---------|----------------------|---------------------------------|--------|
|         |                      | $\mu\text{M}$                   | ppb    |
| CTC     | 886.726              | 2.788 E-03                      | ~0.114 |



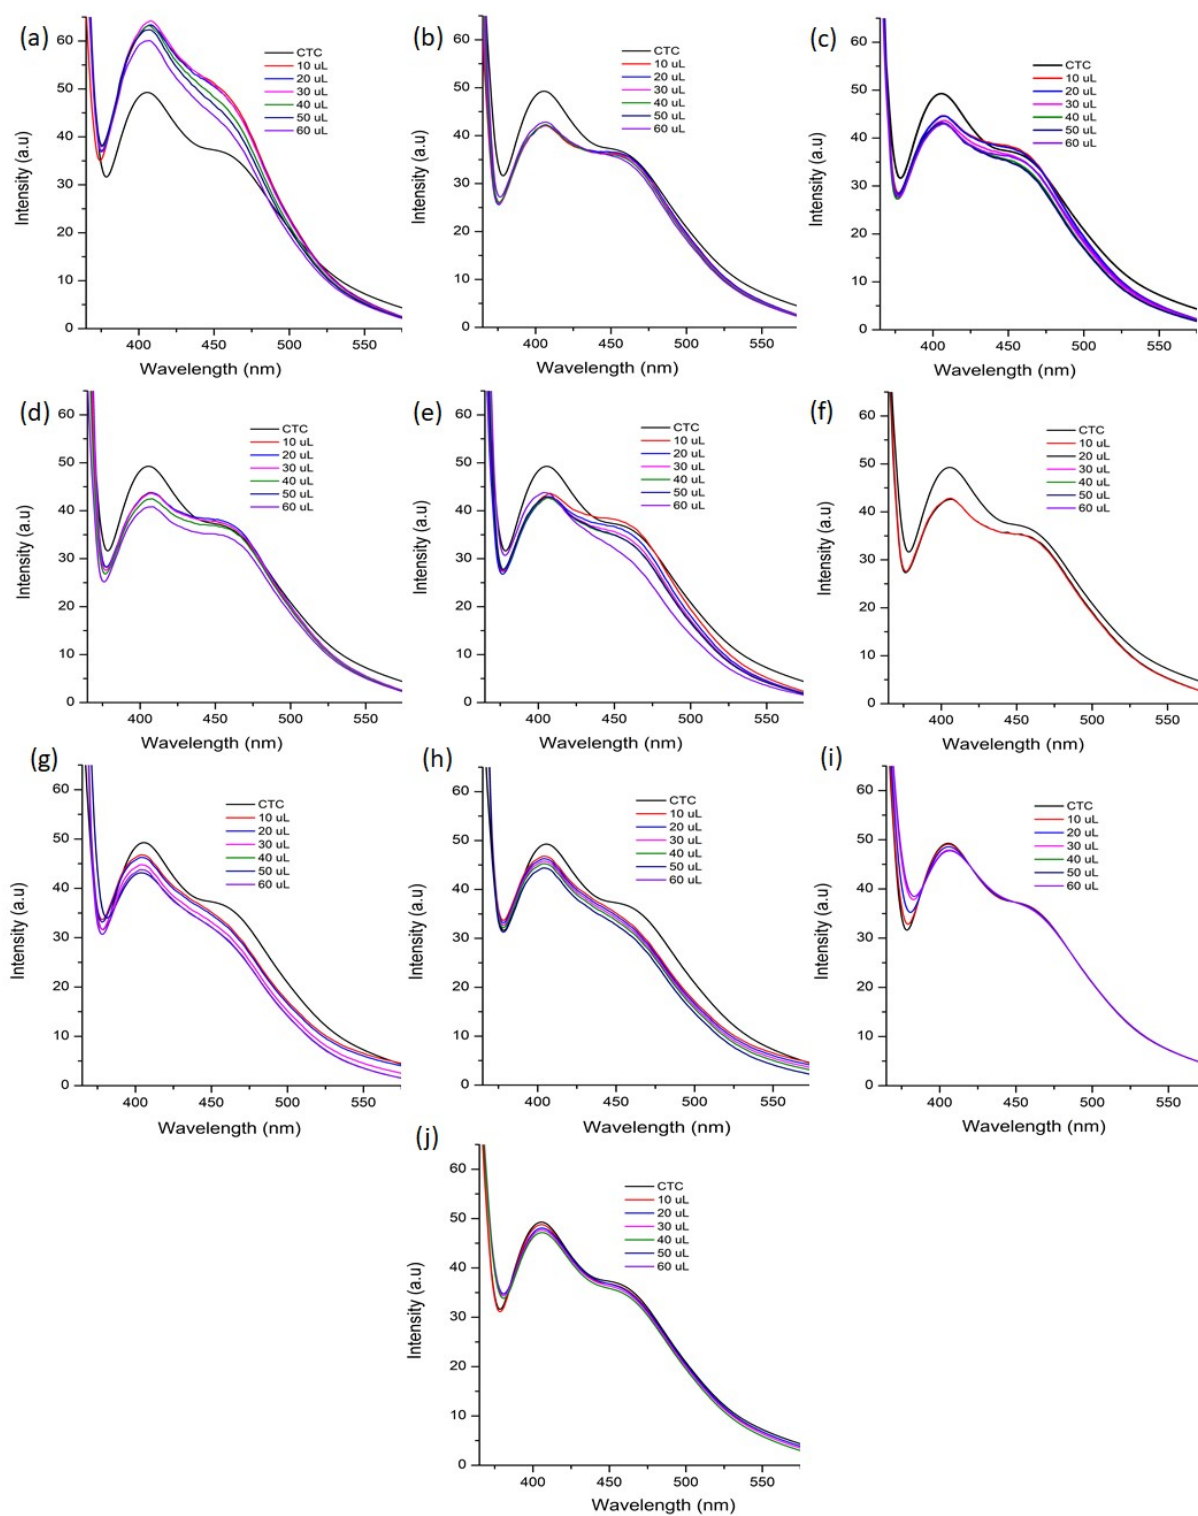

**Figure S14.** The change in fluorescence intensity of CTC upon incremental addition of (a)  $\text{Cr}^{2+}$ , (b)  $\text{Mn}^{2+}$ , (c)  $\text{Ni}^{2+}$ , (d)  $\text{Zn}^{2+}$ , (e)  $\text{Cu}^{2+}$ , (f)  $\text{Fe}^{2+}$ , (g)  $\text{Ca}^{2+}$ , (h)  $\text{Li}^+$ , (i)  $\text{Na}^+$  and (j)  $\text{K}^+$ .

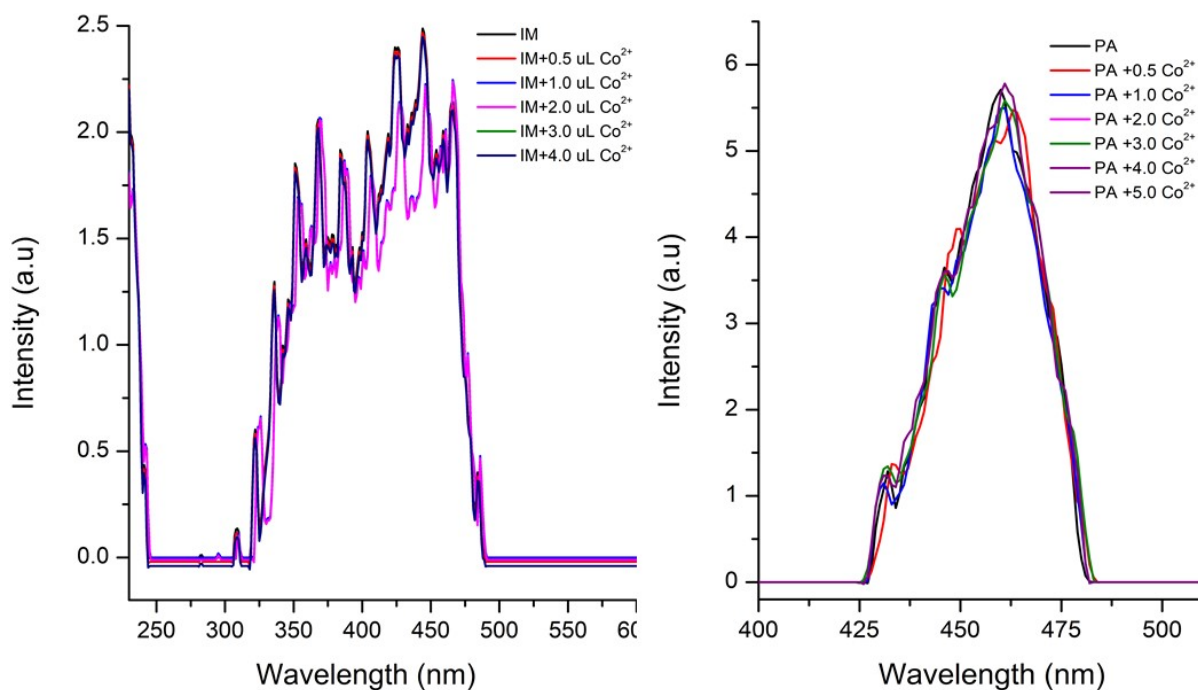

**Figure S15.** The change in fluorescence intensity of PA (left) and IM (right) on adding  $\text{Co}^{2+}$ .

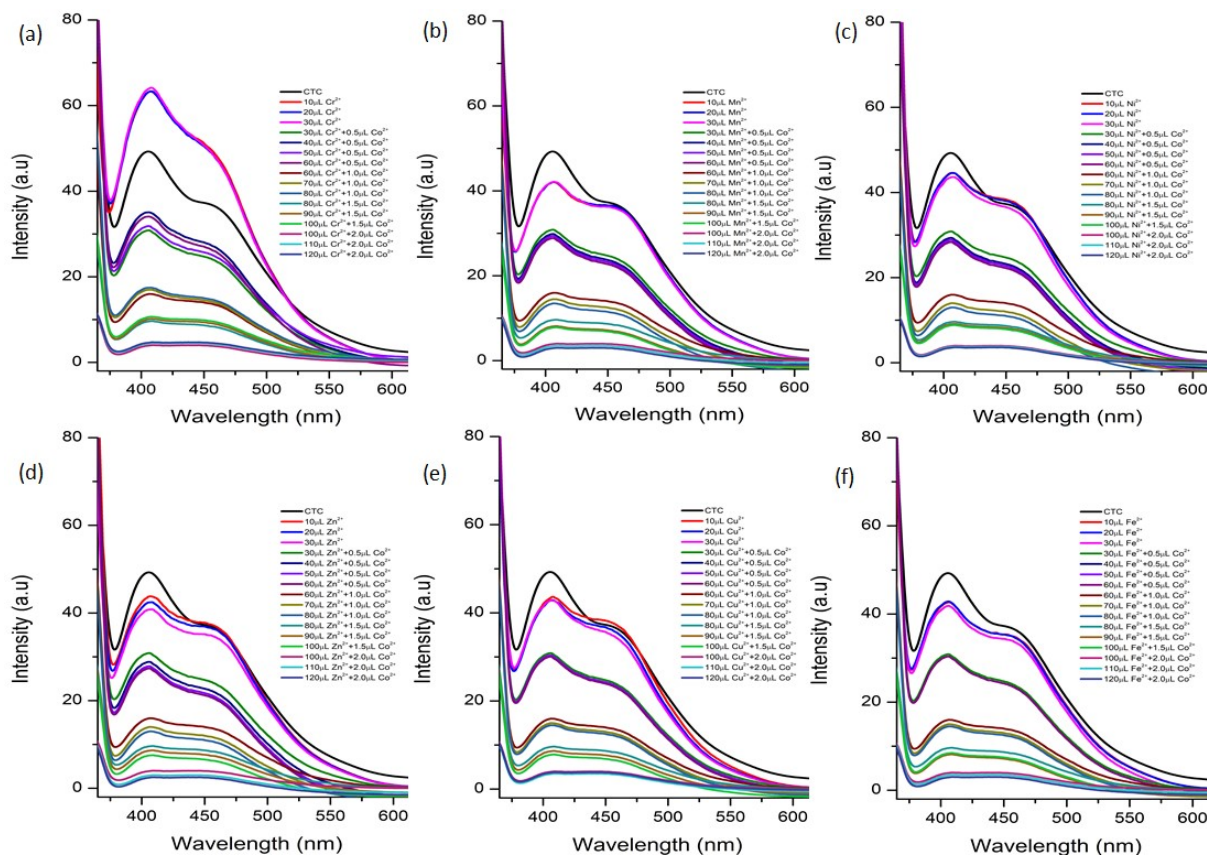

**Figure S16.** The change in fluorescence intensity of CTC upon addition of different metal ions followed by  $\text{Co}^{2+}$ .

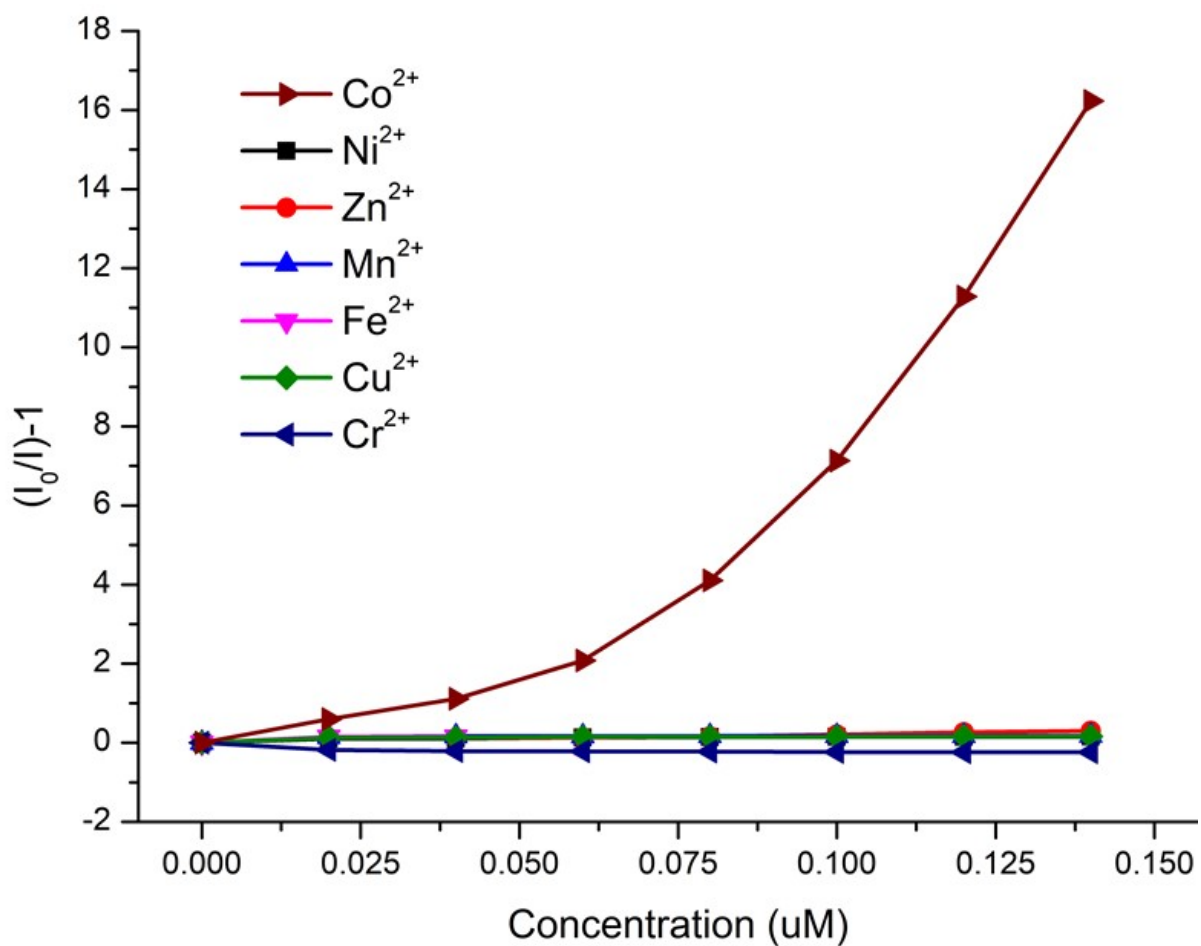

**Figure S17.** Stern-Volmer (SV) plots for various metal ions in DMSO/H<sub>2</sub>O.

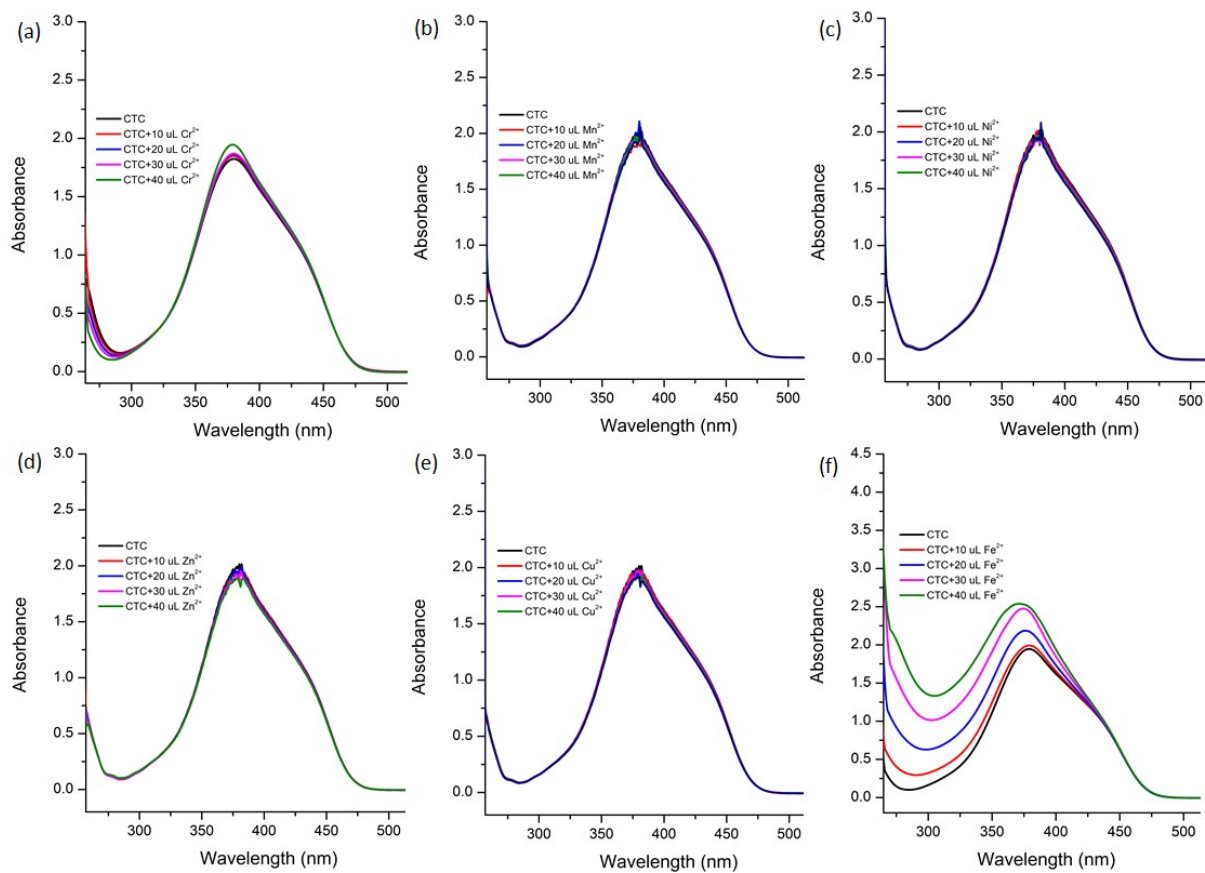

**Figure S18.** UV-vis spectra of CTC upon incremental addition of (a)  $\text{Cr}^{2+}$ , (b)  $\text{Mn}^{2+}$ , (c)  $\text{Ni}^{2+}$ , (d)  $\text{Zn}^{2+}$ , (e)  $\text{Cu}^{2+}$  and (f)  $\text{Fe}^{2+}$ .

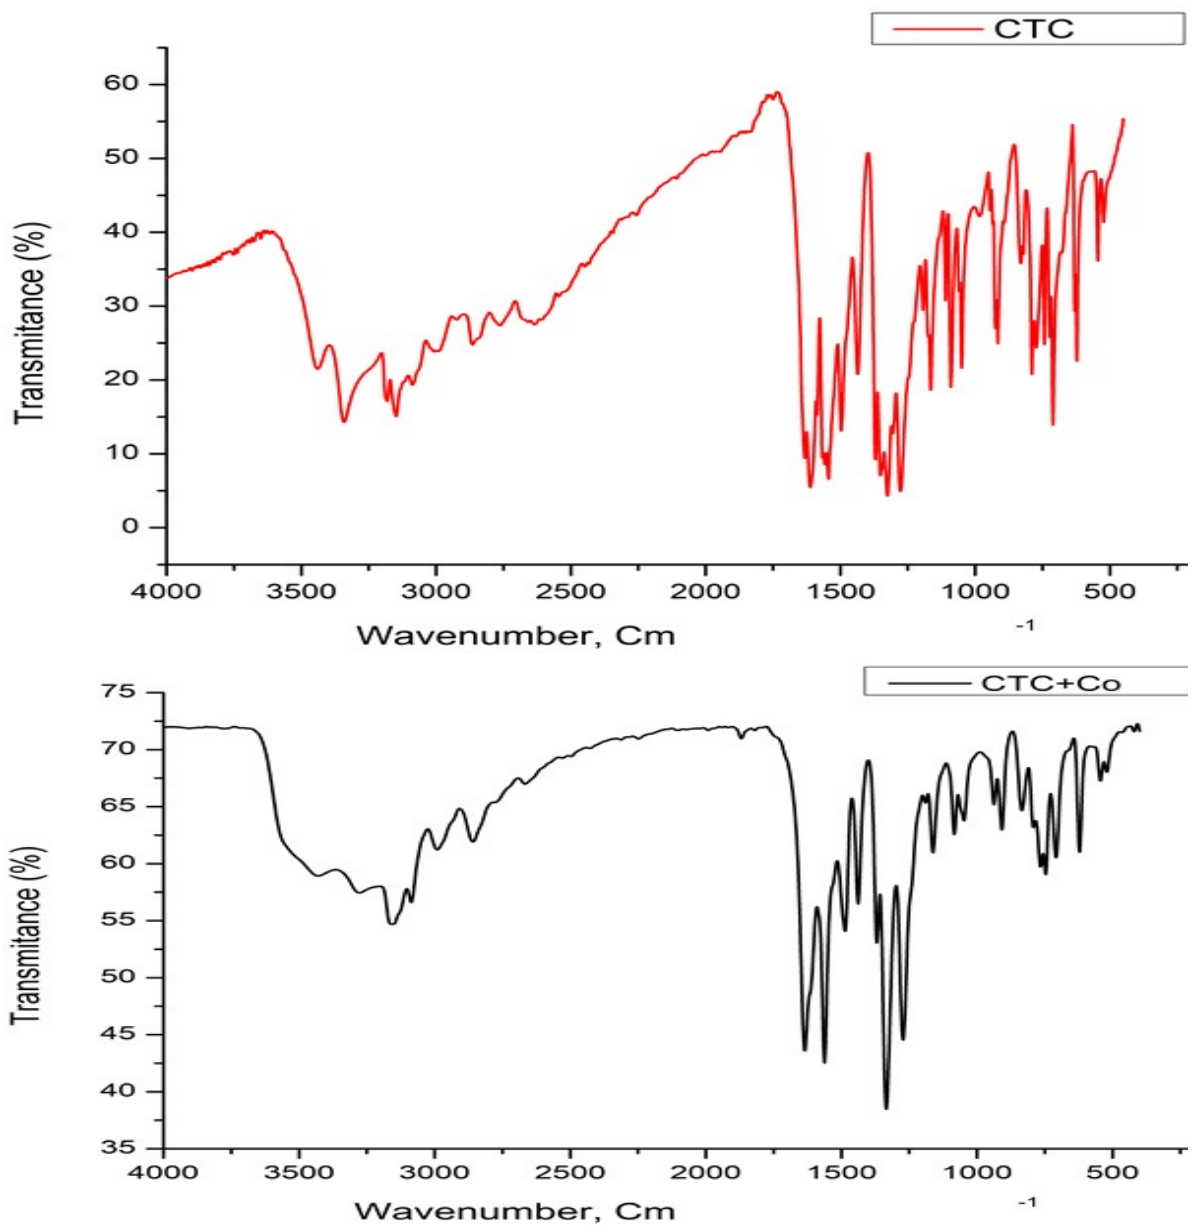

**Figure S19.** FTIR of CTC (top) and CTC-Co<sup>2+</sup> (bottom).

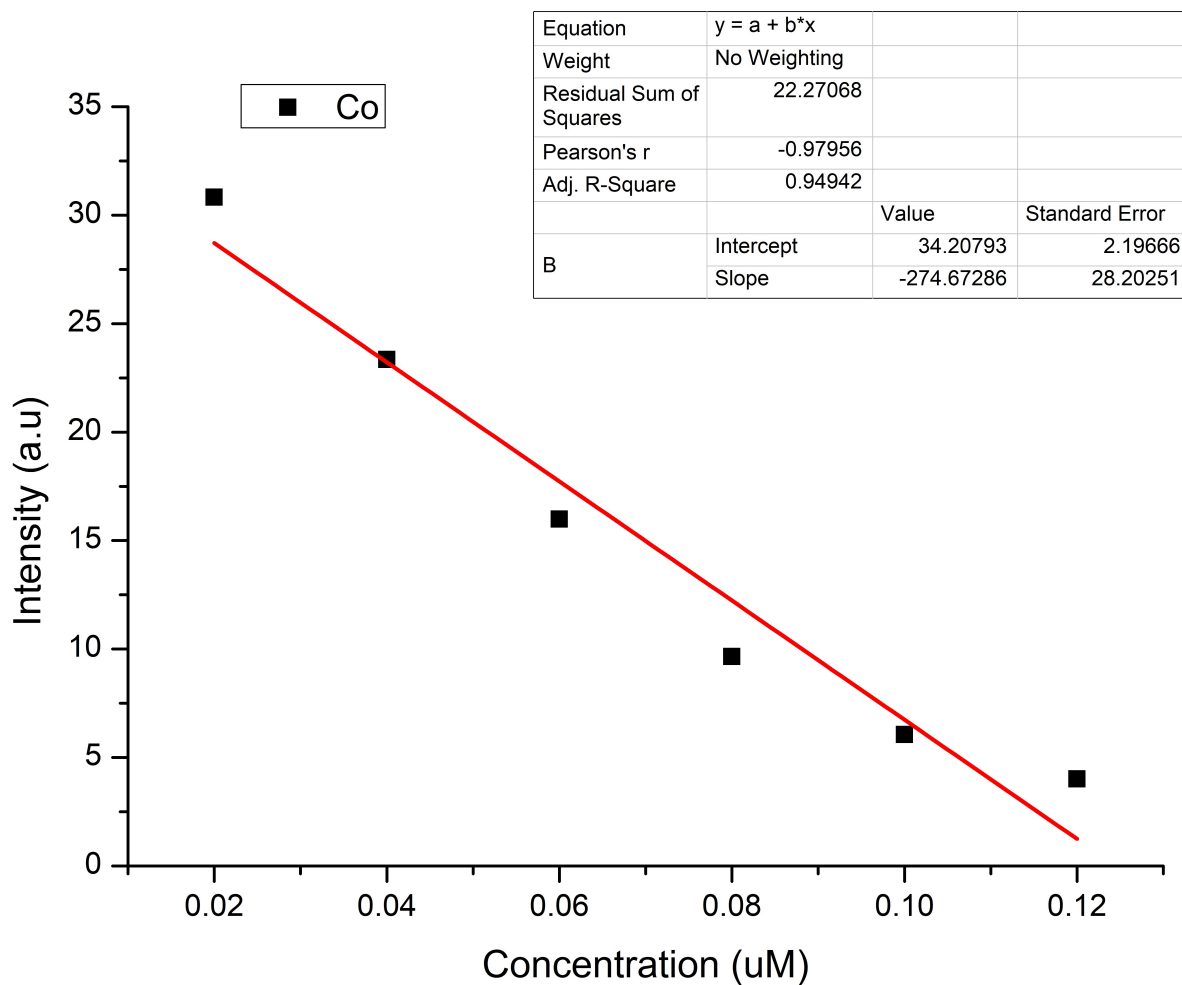

**Figure S20.** Linear region of fluorescence intensity of CTC upon addition of NB (0.5 – 5  $\mu$ L, 1 mM stock solution) in water/DMSO.

**Table S6.** Calculation of standard deviation for CTC

|                                                 |                     |
|-------------------------------------------------|---------------------|
| Blank Readings (only probe)                     | FL Intensity of CTC |
| Reading 1                                       | 49.26               |
| Reading 2                                       | 51.22               |
| Reading 3                                       | 50.00               |
| Reading 4                                       | 49.98               |
| Reading 5                                       | 49.99               |
| <b>Standard Deviation (<math>\sigma</math>)</b> | <b>0.7033850</b>    |

**Table S7.** Detection limit calculation of CTC for NB.

| Complex | Slope from Graph<br>(m) | Detection limit<br>( $3\sigma/m$ ) |        |
|---------|-------------------------|------------------------------------|--------|
|         |                         | $\mu\text{M}$                      | ppb    |
| CTC     | 274.672                 | 7.684 E-03                         | ~0.589 |

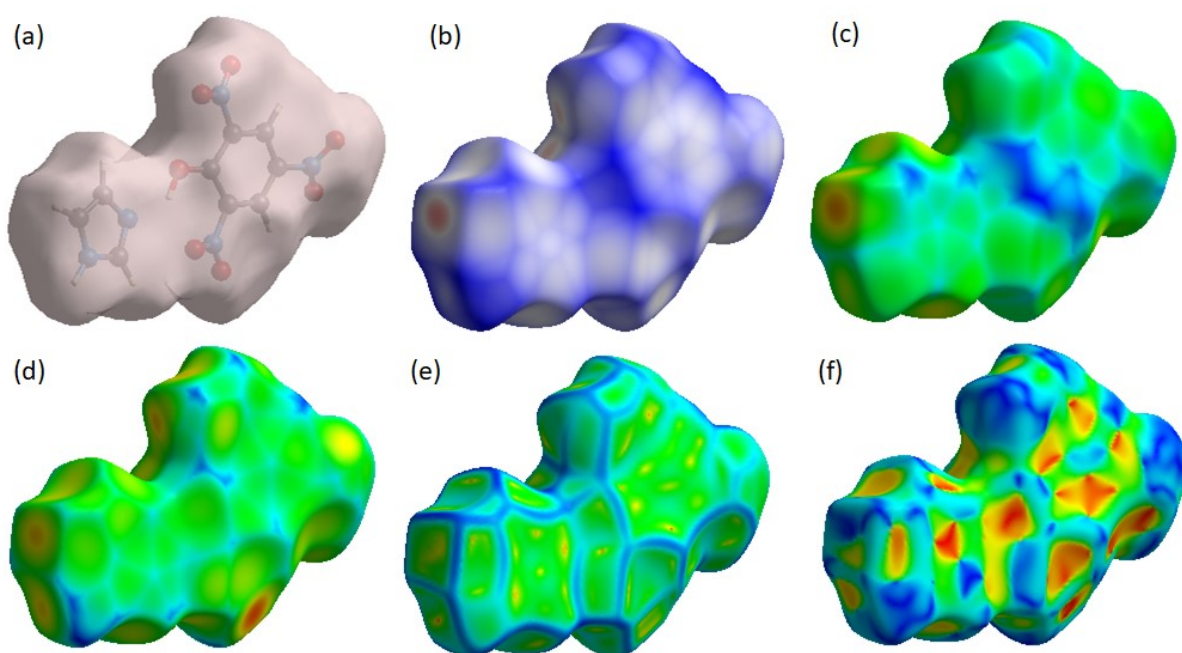

**Figure S21.** Hirshfeld surface of the CTC mapped with (a) none, (b)  $d_{\text{norm}}$ , (c)  $d_i$ , (d)  $d_e$ , (e) curvedness, (f) shape index.

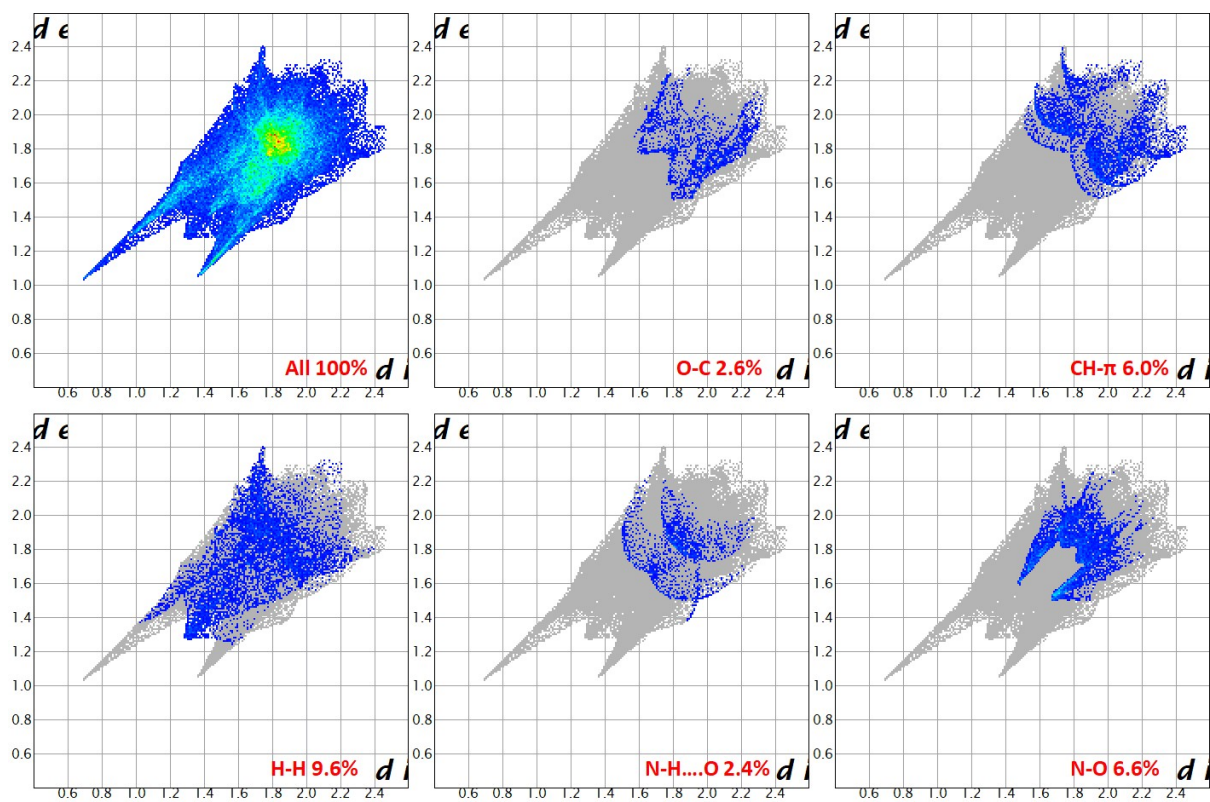

**Figure S22.** 2D fingerprint plots of the CT complex representing different intermolecular interactions.



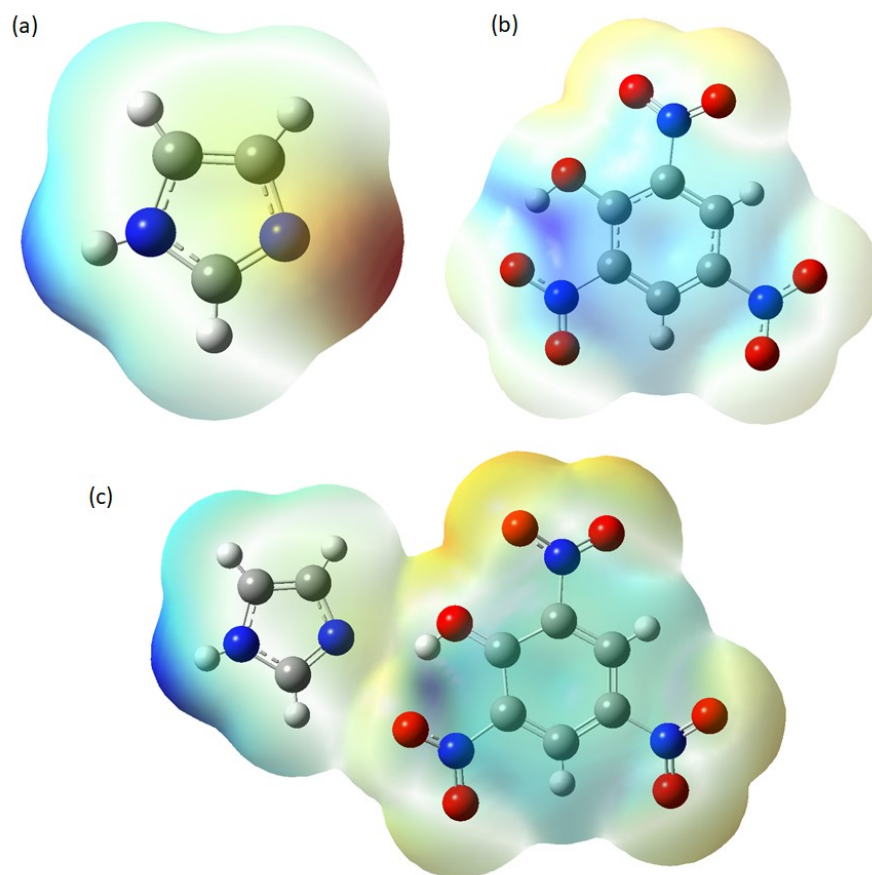

**Figure S23.** MEP surface map of (a) IM, (b) PA and (c) CTC showing difference in colour.

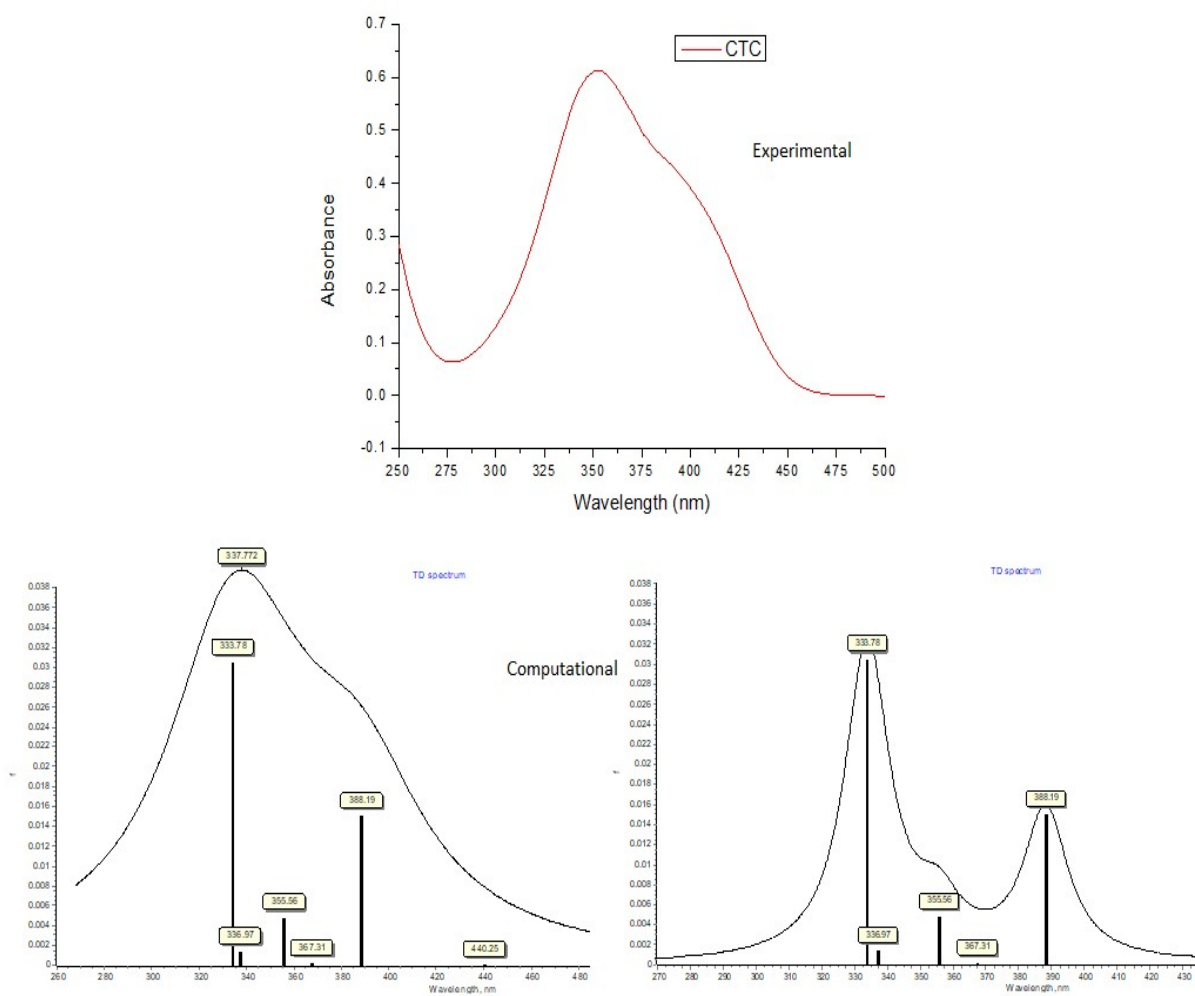

**Figure S24.** Experimental (top) and Computational by TD-DFT (bottom) UV-vis spectra of CTC.

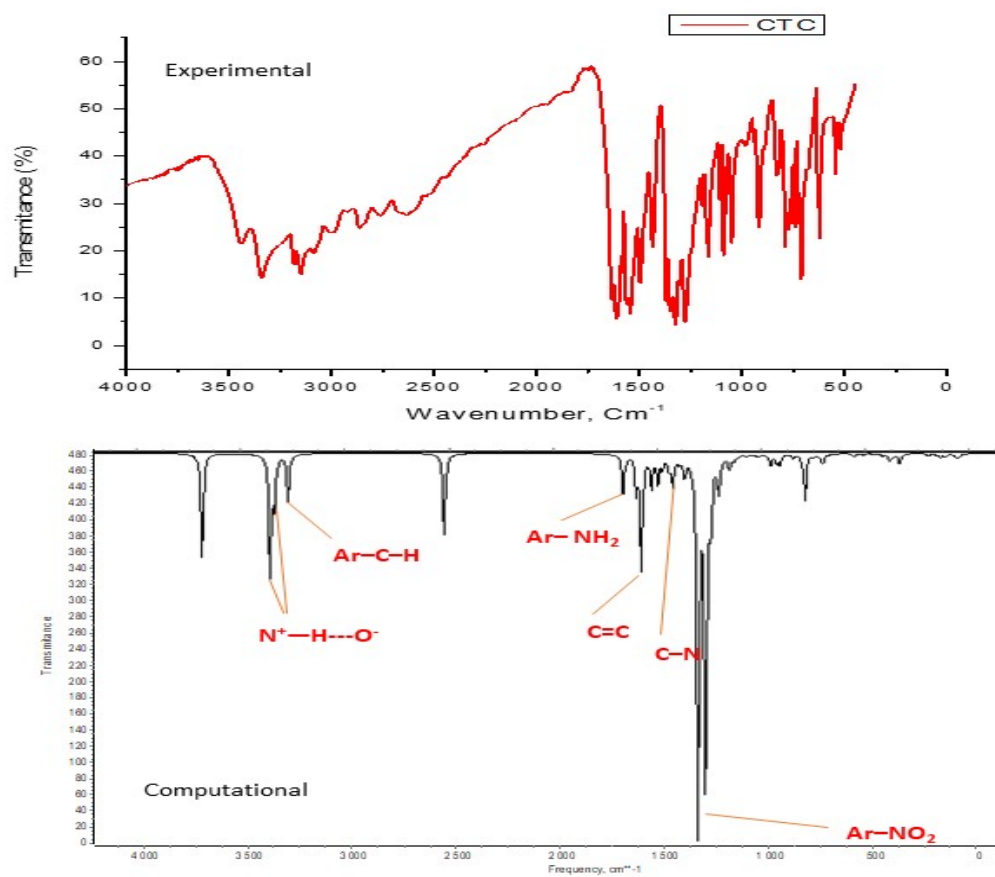

**Figure S25.** Experimental (top) and Computational by TD-DFT (bottom) FTIR spectra of CTC.

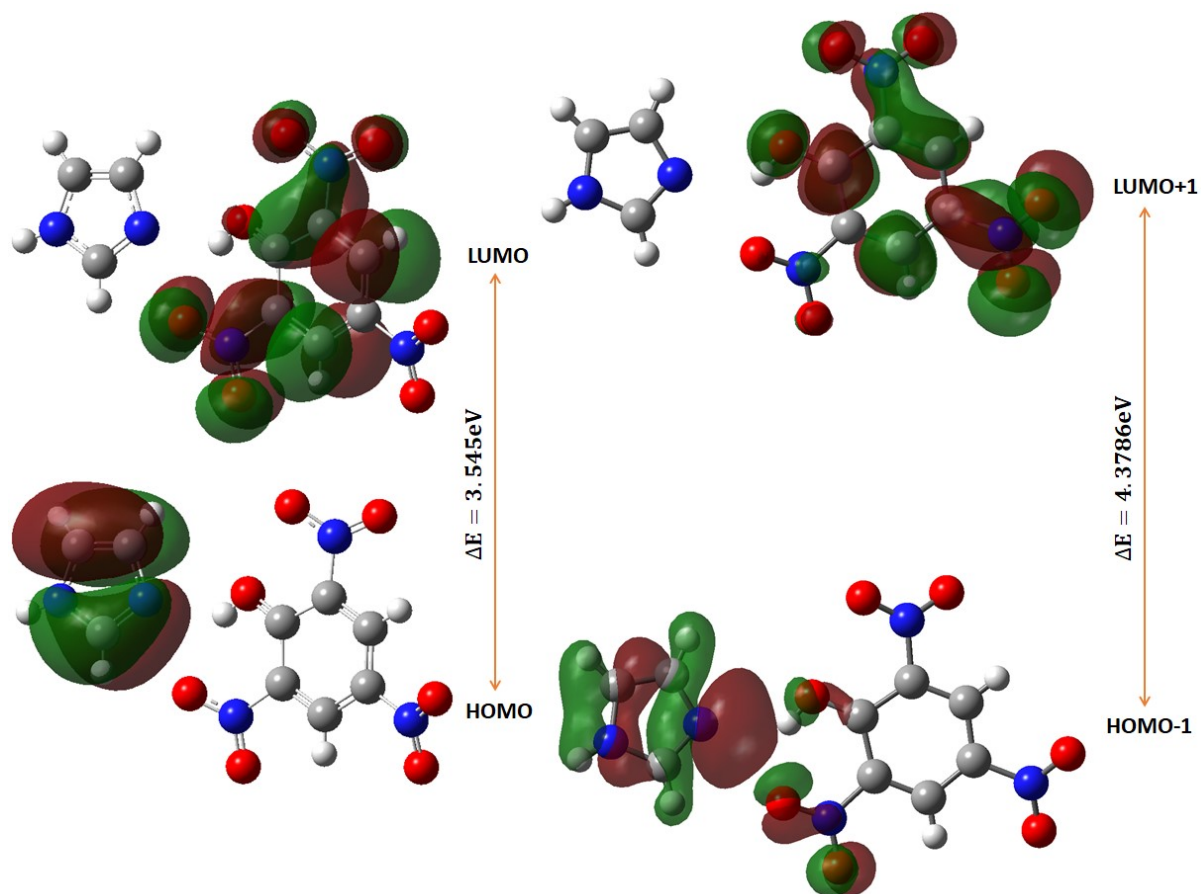

**Figure S26.** The pictorial representation of frontiers molecular orbital.

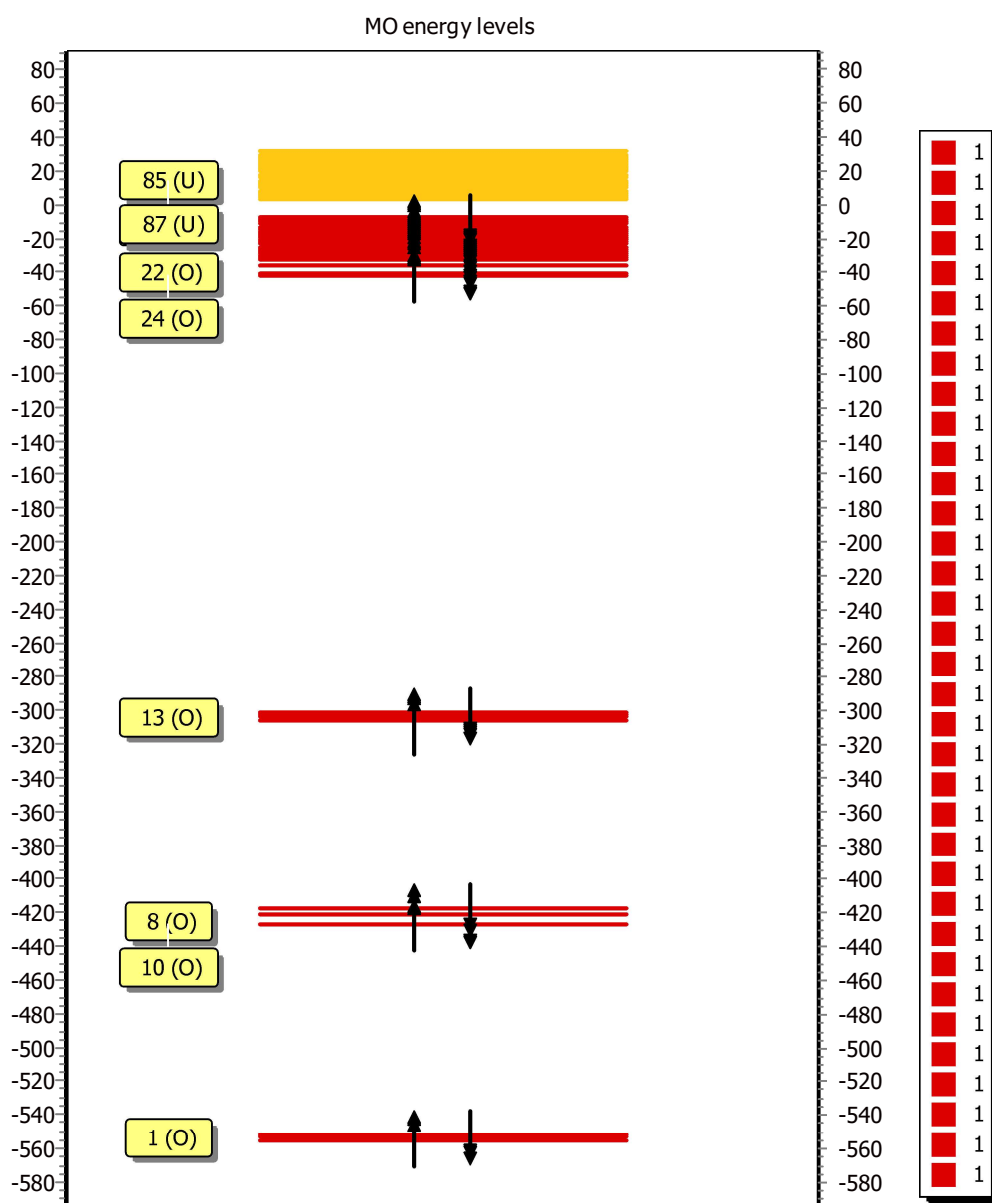

**Figure S27.** MO energy level diagram of CTC.

**Table S8.** Molecular orbital energies for CT complex.

| <b>MO NO.</b> | <b>Energy</b> | <b>MO NO.</b> | <b>Energy</b> | <b>MO NO.</b> | <b>Energy</b> |
|---------------|---------------|---------------|---------------|---------------|---------------|
| 1             | -555.43       | 37            | -25.3095      | 73            | -8.30498      |
| 2             | -552.175      | 38            | -22.9884      | 74            | -8.08729      |
| 3             | -551.963      | 39            | -22.3679      | 75            | -7.97572      |
| 4             | -551.821      | 40            | -21.7285      | 76            | -7.79884      |
| 5             | -551.77       | 41            | -21.0835      | 77            | 3.63547       |
| 6             | -551.541      | 42            | -20.9475      | 78            | 4.079019      |
| 7             | -551.155      | 43            | -20.7244      | 79            | 5.393339      |
| 8             | -426.945      | 44            | -19.6141      | 80            | 7.129439      |
| 9             | -426.64       | 45            | -18.9447      | 81            | 7.368901      |
| 10            | -426.637      | 46            | -18.6916      | 82            | 7.534892      |
| 11            | -420.661      | 47            | -18.5937      | 83            | 10.1717       |
| 12            | -417.08       | 48            | -18.3733      | 84            | 11.39622      |
| 13            | -305.739      | 49            | -18.0685      | 85            | 12.13365      |
| 14            | -303.271      | 50            | -17.9678      | 86            | 13.77179      |
| 15            | -303.178      | 51            | -17.4127      | 87            | 14.20446      |
| 16            | -303.154      | 52            | -16.8467      | 88            | 15.91879      |
| 17            | -303.096      | 53            | -16.6372      | 89            | 16.58275      |
| 18            | -303.045      | 54            | -16.4385      | 90            | 17.73108      |
| 19            | -302.446      | 55            | -16.3841      | 91            | 17.96782      |
| 20            | -301.578      | 56            | -16.2263      | 92            | 19.45629      |
| 21            | -300.745      | 57            | -15.9079      | 93            | 19.67127      |
| 22            | -42.2487      | 58            | -15.8154      | 94            | 19.8563       |
| 23            | -42.0827      | 59            | -15.5487      | 95            | 19.94066      |
| 24            | -41.8977      | 60            | -15.282       | 96            | 20.57741      |
| 25            | -40.7113      | 61            | -14.0874      | 97            | 20.67265      |
| 26            | -36.0336      | 62            | -13.5378      | 98            | 21.06722      |
| 27            | -35.9656      | 63            | -10.6044      | 99            | 21.60873      |
| 28            | -35.7533      | 64            | -10.5744      | 100           | 22.4659       |
| 29            | -35.5737      | 65            | -10.2833      | 101           | 22.66182      |
| 30            | -32.5287      | 66            | -10.0792      | 102           | 23.21149      |
| 31            | -31.3069      | 67            | -10.0003      | 103           | 24.53942      |
| 32            | -29.911       | 68            | -9.92679      | 104           | 24.92855      |
| 33            | -29.3232      | 69            | -9.78801      | 105           | 25.11631      |
| 34            | -27.2878      | 70            | -9.76624      | 106           | 25.49727      |
| 35            | -25.9762      | 71            | -9.60025      | 107           | 25.95442      |
| 36            | -25.5762      | 72            | -8.37845      | 108           | 26.74084      |
